# Supplementary material
Source: Springer Nature journal article supplement (https://www.springermedizin.de/resource/supplementary/13058_2014_3414_MOESM2_ESM.pdf/9704128)
Supplement: MOESM2 [file 9704128]

## Supplementary Figure S1

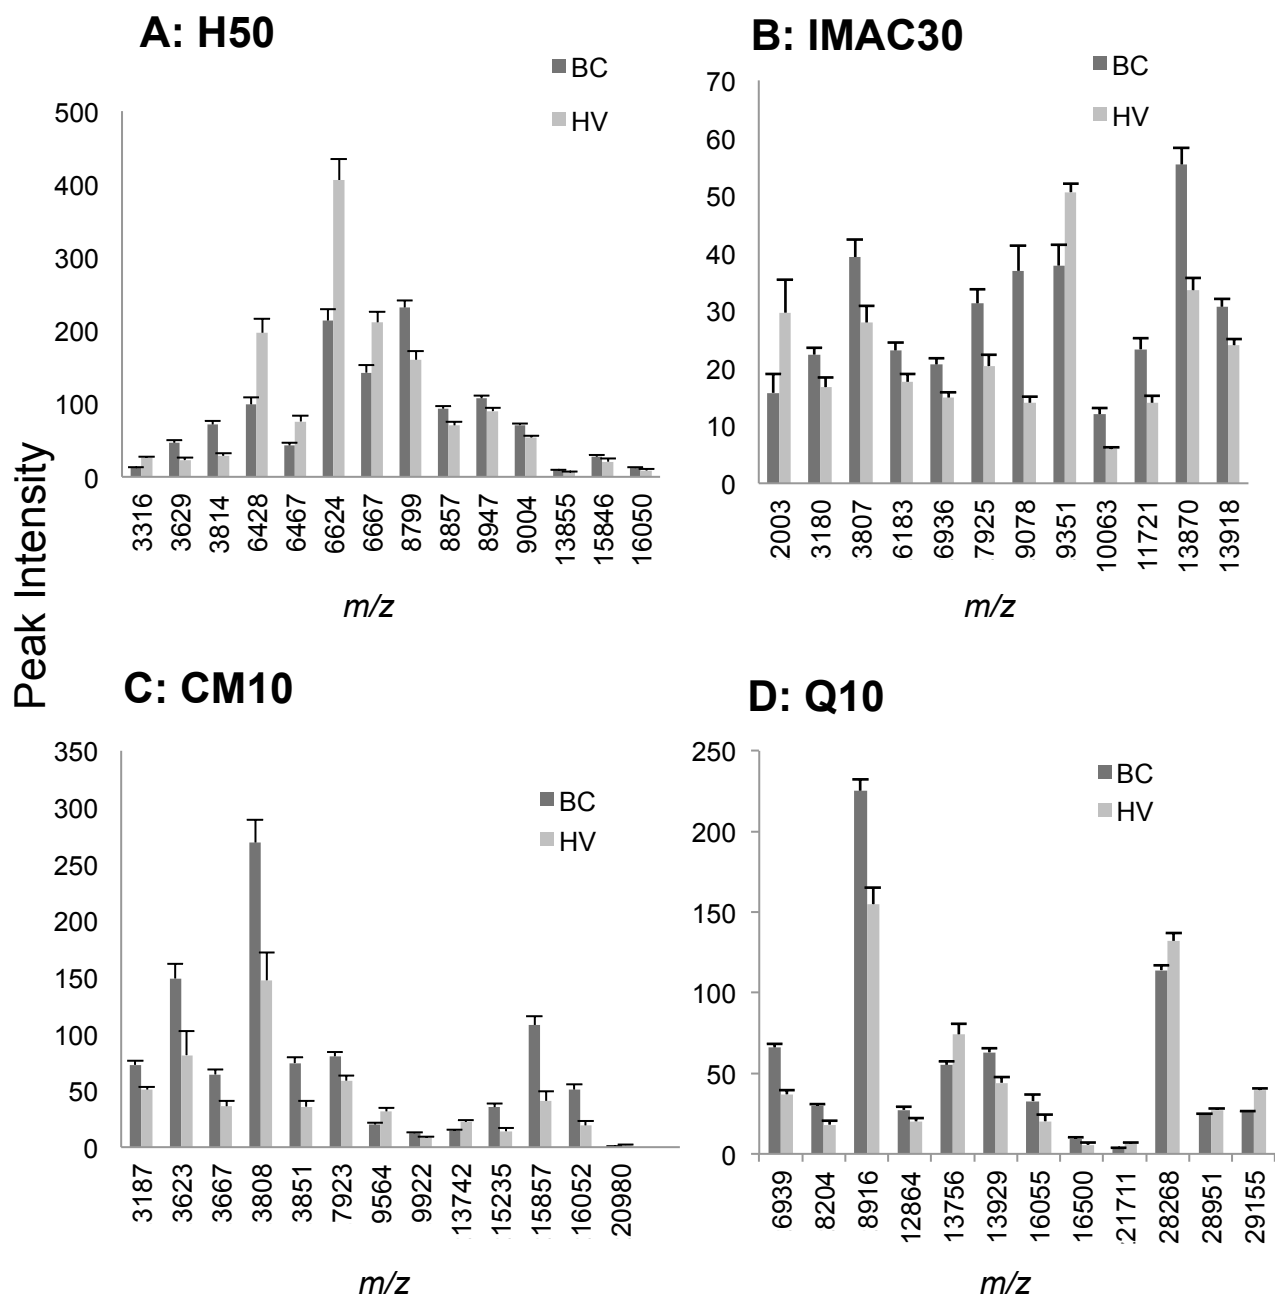

**Supplementary Figure S1. Comparison of discriminatory protein peaks detected on H50, IMAC30, CM10 and Q10 protein chip arrays.** Determined by univariate analysis, 14 peaks from H50 (A), 12 from IMAC30 (B), 13 from CM10 (C), and 12 from Q10 (D) were significantly either up- or down- regulated ( $p < 0.005$ ) in sera from BC patients compared to HV patients.
